# Supplementary material for: The Essential Oil from Conyza bonariensis (L.) Cronquist (Asteraceae) Exerts an In Vitro Antimelanoma Effect by Inducing Apoptosis and Modulating the MAPKs, NF-κB, and PKB/AKT Signaling Pathways
Source: MDPI journal article supplement (doi:10.3390/ph16111553), 2023-11-02
Supplement: s1 [file s1]

## SUPPORTING INFORMATION

### **The Essential Oil from *Conyza bonariensis* (L.) Cronquist (Asteraceae) Exerts In Vitro Antimelanoma Effect by Inducing Apoptosis and Modulating the MAPKs, NF- $\kappa$ B, and PKB/AKT Signaling Pathways**

Rafael Carlos Ferreira <sup>1</sup>, Sâmia Sousa Duarte <sup>1</sup>, Valgrícia Matias de Sousa <sup>1</sup>, Ramon Ramos Marques de Souza <sup>1</sup>, Karinne Kelly Gadelha Marques <sup>1</sup>, Renata Albuquerque de Abrantes <sup>1</sup>, Yuri Manguiera do Nascimento <sup>1</sup>, Natália Ferreira de Sousa <sup>1</sup>, Marcus Tullius Scotti <sup>1</sup>, Luciana Scotti <sup>1</sup>, Josean Fachine Tavares <sup>1</sup>, Juan Carlos Ramos Gonçalves <sup>1</sup>, Marcelo Sobral da Silva <sup>1</sup> and Marianna Vieira Sobral <sup>1,\*</sup>

<sup>1</sup> Postgraduate Program in Natural Products and Bioactive Synthetics, Federal University of Paraíba, João Pessoa 58051-970, PB, Brazil

\* Correspondence: mariannavbs@gmail.com

## CONTENT

**Figure S1.** Chromatogram of the essential oil from *Conyza bonariensis* (L.) aerial parts (CBEO)....3

**Figure S2.**  $^1\text{H}$  NMR spectrum of the essential oil from *Conyza bonariensis* (L.) aerial parts (CBEO)  
.....3

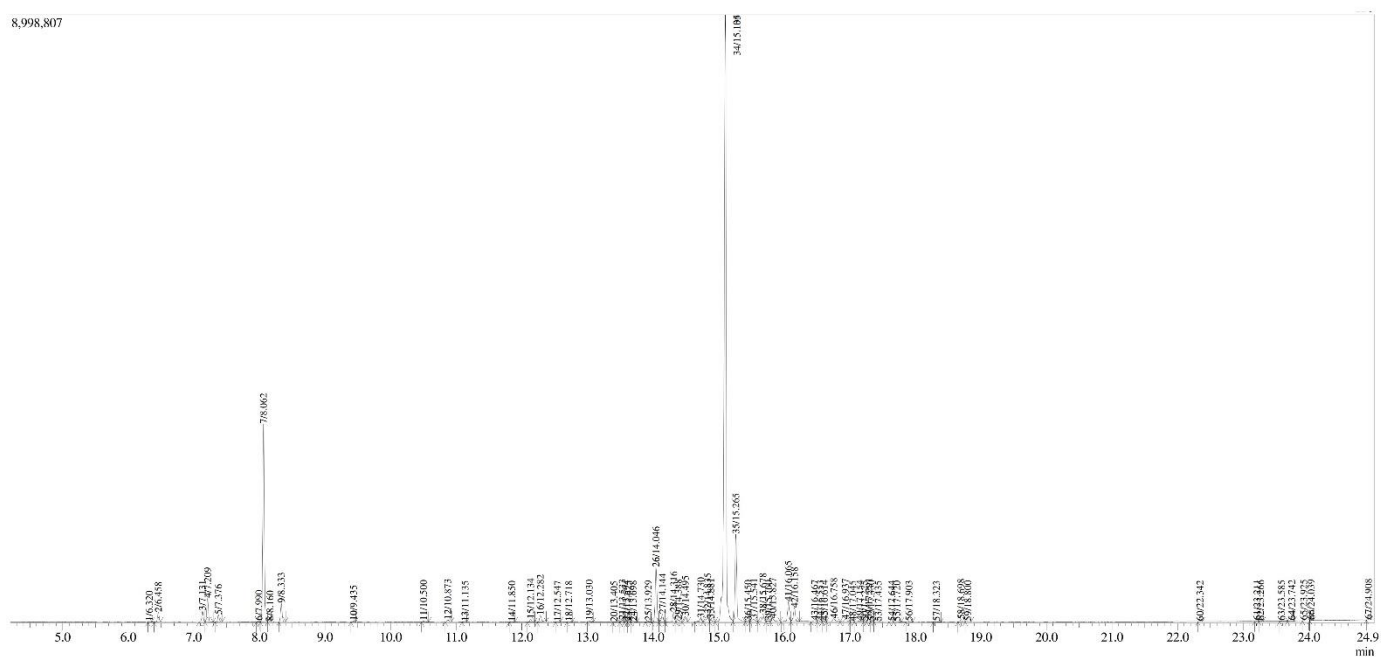

**Figure S1.** Chromatogram of the essential oil from *Conyza bonariensis* (L.) aerial parts (CBEO)

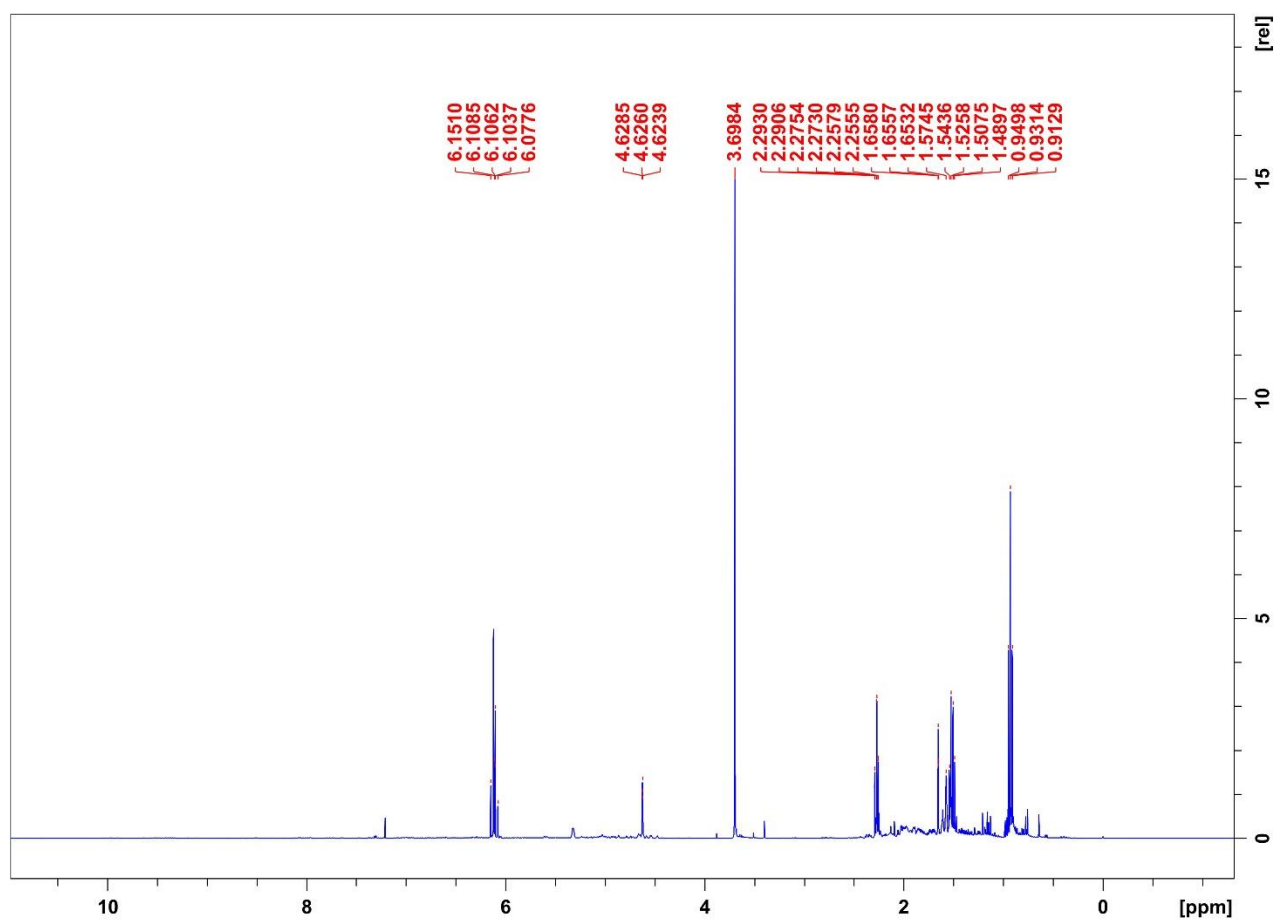

**Figure S2.**  $^1\text{H}$  NMR spectrum of the essential oil from *Conyza bonariensis* (L.) aerial parts (CBEO)
